1 **Prevalence and Risk Factors of Diarrhea Among Children Under Five Years in Northern**  
2 **Kenya's Drylands: A Longitudinal Study**

3 Bonventure Mwangi<sup>1\*</sup>, Valerie L. Flax<sup>2</sup>, Faith Thuita<sup>3,4</sup>, Joshua D. Miller<sup>5</sup>, Chessa Lutter<sup>2</sup>,

4 Dickson Amugsi<sup>1</sup>, Estelle Sidze<sup>1</sup>, Linda Adair<sup>5</sup>, Esther Anono<sup>1</sup>, Hazel Odhiambo<sup>1</sup>, Stephen

5 Ekiru<sup>1</sup>, Gillian Chepkwony<sup>1</sup>, Monica Ng'ang'a<sup>3</sup>, Albert Webale<sup>3</sup>, Elizabeth Kimani-Murage<sup>1</sup>,

6 Calistus Wilunda<sup>1</sup>

7

8 <sup>1</sup> African Population and Health Research Center, APHRC Campus, Kitisuru, Nairobi,

9 Kenya.

10 <sup>2</sup> RTI International, Research Triangle Park, North Carolina, United States of America.

11 <sup>3</sup> RTI International, Nairobi, Kenya.

12 <sup>4</sup> Department of Public and Global Health, University of Nairobi, Nairobi, Kenya.

13 <sup>5</sup> Department of Nutrition, University of North Carolina at Chapel Hill, Chapel Hill, NC,

14 United States of America.

15

16 \*Corresponding author

17 African Population and Health Research Center, P.O. Box 10787-00100, APHRC Campus,

18 Kitisuru, Nairobi, Kenya.

19 E-mail: [bmwangi@aphrc.org](mailto:bmwangi@aphrc.org) (BM)

## 20 **Abstract**

21 Diarrhea is the third leading cause of malnutrition and mortality in children under five globally.  
22 However, a few studies have examined predictors of child diarrheal disease in arid or semi-arid  
23 regions of sub-Saharan Africa. This study aimed to assess the prevalence and risk factors of  
24 diarrhea among children under five in the drylands of Northern Kenya.

25 Data are from a longitudinal, population-based study of children younger than 36 months at  
26 recruitment (N = 1,211) and their caregivers in Turkana County, Kenya. Households were  
27 followed from May 2021 to September 2023, with survey data collected every four months  
28 across six waves. Caregivers reported on household conditions and observed episodes of  
29 diarrhea among index children in the two weeks before the survey. Trends in the prevalence of  
30 diarrhea were stratified by administrative zone, livelihood zone, and child sex. Risk factors of  
31 child diarrhea across survey waves were identified using multivariable generalized estimating  
32 equations.

33 Diarrhea prevalence decreased from 32.1% [95% confidence interval (CI): 28.3%-36.1%] at  
34 Wave 1 to 8.7% (95% CI: 6.3%-11.7%) at Wave 6. Risk factors for diarrhea included  
35 caregivers alcohol consumption [adjusted odds ratio (AOR) = 1.30; 95% CI: 1.04-1.62],  
36 households experiencing three (AOR = 1.78; 95% CI: 1.29-2.45) or four (AOR = 2.58; 95%  
37 CI: 1.86-3.58) climatic, biological, economic or conflict shocks in the prior 4 months compared  
38 to those experiencing less than 2 shocks, households with moderate (AOR = 1.25; 95% CI:  
39 1.04-1.50) or high (AOR = 1.50; 95% CI: 1.22-1.85) water insecurity in the prior 4 weeks  
40 compared to those with no-to-marginal water insecurity, and child wasting (AOR = 1.22; 95%  
41 CI: 1.05–1.41).

42 These findings suggest that multisectoral interventions that reduce alcohol consumption among  
43 women, improve access to safe water services, manage malnutrition, and mitigate household  
44 shocks could reduce the burden of diarrhea among child under five in this region.

## 45 **Introduction**

46 Diarrhea, the passage of three or more loose or liquid stools per day, is the third leading cause  
47 of death among children under five years of age globally [1]. Approximately 90% of these  
48 deaths occur in sub-Saharan Africa and South Asia [2]. Diarrhea also increases the risk of  
49 dehydration, appetite loss, malnutrition, electrolyte deficiencies, infectious disease, delayed  
50 physical growth, and cognitive impairments [1,3–5]. Malnutrition and diarrhea are interrelated,  
51 with each condition exacerbating the other, creating a cycle that severely compromises the  
52 long-term health and development of impacted children [6,7].

53

54 Previous studies in sub-Saharan Africa have identified factors associated with a higher risk of  
55 child diarrhea. These include younger child age [8–12], low maternal education [12–14], young  
56 maternal age [12,15], maternal unemployment [12,15], poor hand hygiene [16–18], open  
57 defecation [19–21], improper disposal of children's stool [22,23], and households with more  
58 members [12,24,25]. Recent research also underscores the influence of behavioral,  
59 sociocultural, and socioeconomic factors on the prevalence of diarrhea in rural areas [26].  
60 Given this, interventions that increase access to child-friendly sanitation infrastructure, change  
61 hand hygiene behavior and expand access to improved water services have been recommended  
62 to reduce the burden of child diarrhea [26,27]. A longitudinal study conducted in urban settings  
63 of developing countries confirmed the importance of sanitation as a major determinant of child  
64 diarrhea [28].

65

66 In sub-Saharan Africa's arid and semi-arid lands (drylands), climate change has intensified  
67 droughts, significantly impacting livelihoods, household water, and food security [29–33].  
68 Communities living in drylands experience food and water insecurity and predominantly rely  
69 on nomadic or semi-nomadic pastoralist livelihoods, increasing the risk of malnutrition [34].

70 Recurrent household climatic shocks in the region reduce agricultural productivity, damage  
71 critical infrastructure, and negatively impact health and well-being [15,35–37]. Additionally,  
72 limited access to improved water, sanitation, and hygiene services in the area increases  
73 exposure to vectors of diarrheal disease [3,32,38,39]. Moreover., households facing health  
74 shocks find themselves impoverished due to loss of income to facilitate access to quality health  
75 care and payment of health insurance [40,41].

76

77 While the distinctive conditions of drylands pose heightened risks for diarrhea, limited research  
78 investigates how environmental, socioeconomic, and behavioral factors intersect to influence  
79 diarrhea risk in these regions, particularly in Northern Kenya. To address this knowledge gap,  
80 we aim to assess the prevalence and risk factors of diarrhea among children under five in the  
81 drylands of Northern Kenya.

82

## 83 **Materials and methods**

### 84 **Study area**

85 This study was carried out as part of the USAID Nawiri program [42], to inform program  
86 design and adaptation. The study used data collected in Turkana County, which is in north-  
87 western Kenya and has seven sub-counties, 30 wards, and 156 sub-locations [43]. This region  
88 is characterized by low annual rainfall, high year-round temperatures, and a topographically  
89 varied landscape that ranges from semi-arid to arid. Traditionally, the Turkana people are  
90 nomadic pastoralists, relying on livestock and migrating in search of pasture to support their  
91 livelihoods. In addition to pastoralism, some communities practice agro-pastoralism, engaging  
92 in crop farming through irrigation along River Turkwel, and fishing on Lake Turkana [44].

93

## 94 **Study design**

95 Caregivers with children under 36 months were eligible to participate. A multistage sampling  
96 strategy was used to ensure that findings were representative at the regional and sub-regional  
97 levels. In the first stage, the population was stratified based on administrative zones. Within  
98 each stratum, villages were randomly selected. Study staff identified all households in selected  
99 villages to create a sampling frame for eligible households. Households were then randomly  
100 selected from this frame and invited to participate. Further details on the study design are  
101 available in the study protocol [45].

102

## 103 **Data collection**

104 Data were collected from May 2021 to September 2023 across six survey waves conducted  
105 every four months. Trained enumerators administered household and caregiver questionnaires  
106 to participating households. Study staff checked the integrity and validity of the data daily to  
107 ensure data quality.

108

## 109 **Dependent variable**

110 Child diarrhea in the 2 weeks before the survey (yes/no) was based on caregivers' self-report.

111

## 112 **Independent variables**

113 Independent variables included distal, intermediate, and proximal factors, with wasting  
114 considered an additional independent variable given its bidirectional relationship with diarrhea  
115 (Figure 1). Distal factors included administrative and livelihood zones. Intermediate factors  
116 included head of household age (years), household head sex (man/woman), household wealth,

117 number of household members, child age (months), child sex (male/female), child nutrition  
118 indicators, caregiver age (years), caregiver education (formal/no formal education), caregiver  
119 marital status (in union: currently living together; not in union: separated, divorced, widowed  
120 or single), and whether the household experienced shocks in the four months before the survey.  
121 Proximal factors included water, sanitation, and hygiene (WASH) conditions and behaviors.  
122 Caregivers' handwashing after visiting the toilet in the last 24 hours (yes/no) and household  
123 practice of open defecation (yes/no) were based on self-report.

124

125 The county was divided into four administrative zones (Central =1, North =2, South = 3 and  
126 West = 4) which comprised sub-counties: Central (Turkana Central and Loima), North  
127 (Turkana North and Kibish), South (Turkana East and Turkana South) and West (Turkana  
128 West). The livelihood zones in Turkana County were broadly categorized into four zones  
129 namely pastoral, agro-pastoral, fisher folks and urban/peri-urban. However, due to small  
130 sample sizes, the agro-pastoral, fisherfolk and urban/peri-urban zones were categorized as non-  
131 pastoral livelihood zone.

132

133 The household wealth was determined based on a factor analysis of household assets, housing  
134 materials, and access to utilities, and divided into tertiles (low, medium, and high). Household  
135 shocks were categorized into four types: climatic (excessive rains/flooding, variable  
136 rain/drought), biological (livestock/crop/human disease outbreak, crop pest invasion, weed  
137 outbreak, and severe illness), economic (loss of livelihood, increased prices in  
138 food/agricultural/livestock inputs, loss of land/rental property, youth unemployment, death of  
139 a household member, delay in food assistance, delay in other safety net programs, and fire) and  
140 conflict (theft/destruction of assets, theft of livestock, domestic violence, and community

141 conflicts) and were binary variables. Further, the shock responses were summed up, and  
142 households were categorized as having experienced less than two, two, three, and four shocks.

143

144 **Figure 1.** A conceptual framework for diarrhea risk factors among children under five

145

146 Household water insecurity was measured using the 12-item Household Water Insecurity  
147 Experiences (HWISE) Scale [46]. Caregivers were asked to report how frequently in the prior  
148 4 weeks they or others in their household experienced diverse water problems (0 = “never”, 1  
149 = “rarely”, 2 = “sometimes”, 3 = “often” or “always”). Responses were summed and  
150 households were categorized as experiencing no-to-marginal (scores of 0-2), low (3-11),  
151 moderate (12-23), or high (24-36) water insecurity. Child wasting was assessed using weight-  
152 for-height/length Z-scores ( $WHZ < -2$  SD), based on the 2006 World Health Organization  
153 (WHO) child growth standards [47].

154

## 155 **Data analysis**

156 Descriptive analyses were performed to examine the weighted distribution of distal factors,  
157 household, caregiver, and child characteristics at Wave 1. We performed univariate analysis to  
158 assess the associations between the dependent variable (child diarrhea) and the independent  
159 variables. The independent variables with a *p-value*  $< 0.20$  were retained and used to build the  
160 final multivariable logistic regression models. To identify salient risk factors of diarrhea,  
161 iterative modeling was used to account for the complex interrelationships between the different  
162 independent variables of interest, adjusting for either distal, intermediate, or proximal factors  
163 based on the conceptual framework in Fig. 1 [48]. Multivariable logistic regressions of child  
164 diarrhea and independent variables using generalized estimating equations with working  
165 correlation matrices were used to account for the within-subject correlation of repeated

166 measurements across survey waves [49,50]. Only those variables with *p-value* < 0.05 were  
167 considered factors associated with diarrhea among children under five years. Adjusted odds  
168 ratios (AOR) and 95% confidence intervals (CIs) were obtained from the adjusted  
169 multivariable logistic regression models and interpreted for significant covariates. All  
170 statistical analyses were performed using Stata 18 (Stata Corp, College Station, TX USA). The  
171 survey proportion command in Stata was used to compare each period and potential factors.  
172 We performed a non-parametric Cochran-Armitage test for the trend in the prevalence across  
173 time using nptrend command and p-value. The xtgee command was used to perform univariate  
174 and multivariable logistic regressions.

175

## 176 **Ethical Considerations**

177 The study was approved by the African Medical and Research Foundation Ethical and  
178 Scientific Review Committee (Amref ESRC P905/2020) and the National Commission for  
179 Science, Technology, and Innovation of Kenya. The institutional review boards at the African  
180 Population and Health Research Center and Research Triangle Institute International signed a  
181 reliance agreement. Informed consent was obtained from the legal guardians of participating  
182 children.

183

## 184 **Results**

185 A total of 1,211 households with eligible children were included in this study and their baseline  
186 descriptive statistics are summarised in Table 1. Overall, 63.9%, lived in the pastoral livelihood  
187 zone. Around two-thirds (61.9%) of the households were headed by men, while females headed  
188 a third (38.1%). 44.6% and 30.6% of households experienced three and four shocks in the 4  
189 months before the survey respectively. Among caregivers, the average age was 33 years, 86.4%



190 had no formal education, 49.6% lived with 3 to 5 children, and 85.2% were in a marital union.  
191 Almost half of the children were boys (54.8%) with 21.8% of children wasted and 32.1%  
192 reported to have experienced diarrhea in the two weeks before the survey.

193

194 **Table 1. Distribution of distal factors, household, caregiver, and child characteristics at**  
195 **baseline, Turkana County (N = 1,211)**

| Characteristic                                            | Weighted % |
|-----------------------------------------------------------|------------|
| <b>Distal factors</b>                                     |            |
| Livelihood zone                                           |            |
| Pastoral                                                  | 63.9       |
| Non-pastoral                                              | 36.1       |
| Administrative zone                                       |            |
| Central                                                   | 21.0       |
| North                                                     | 25.6       |
| South                                                     | 24.1       |
| West                                                      | 29.2       |
| <b>Household characteristics</b>                          |            |
| Age of the household head (years) <sup>a</sup>            | 39.5±13.4  |
| Sex of household head                                     |            |
| Man                                                       | 61.9       |
| Woman                                                     | 38.1       |
| Household size <sup>a</sup>                               | 6.1±2.1    |
| Wealth tertile                                            |            |
| Lowest                                                    | 45.6       |
| Middle                                                    | 33.8       |
| Highest                                                   | 20.6       |
| Shocks experienced in the last 4 months before the survey |            |
| Less than two                                             | 4.2        |
| Two                                                       | 20.6       |
| Three                                                     | 44.6       |
| Four                                                      | 30.6       |
| <b>Caregiver characteristics</b>                          |            |
| Age (years) <sup>a</sup>                                  | 33.1±10.2  |
| Education                                                 |            |
| Formal education                                          | 13.6       |
| No formal education                                       | 86.4       |
| Marital status                                            |            |
| In union                                                  | 85.2       |
| Not in union                                              | 14.8       |
| Number of living children                                 |            |

|                                                         |           |
|---------------------------------------------------------|-----------|
| Less than 3                                             | 25.9      |
| 3-5                                                     | 49.6      |
| 6 or More                                               | 24.4      |
| Current alcohol consumer                                | 8.3       |
| <b><i>Child characteristics</i></b>                     |           |
| Sex                                                     |           |
| Male                                                    | 54.8      |
| Female                                                  | 45.2      |
| Age (months) <sup>a</sup>                               | 17.3±10.6 |
| Wasting (Weight-for-height/length z score < -2SD)       |           |
| Yes                                                     | 21.8      |
| Experience of diarrhea in the 2 weeks before the survey |           |
| Yes                                                     | 32.1      |

<sup>a</sup> Mean ± standard deviation

196

197 The overall weighted prevalence of diarrhea and selected variables in each period were  
198 examined (**Table 2**). The data revealed that 32.1% of the children were reported to have  
199 experienced diarrhea in Wave 1. There was a noticeable decrease from 32.1% to 27.0% in one  
200 year, followed by a further steady decrease to Wave 4. Between Wave 4 to 5, there was  
201 a notable increase in the prevalence by approximately 2%, followed by a decrease of 9.1% to  
202 Wave 6. A similar trend was observed in the livelihood, administrative zones and child sex. A  
203 statistically significant trend in the prevalence of diarrhea was observed in the overall estimates  
204 and the livelihood zones. The prevalence of diarrhea in administrative zones and child age did  
205 not have a statistically significant trend.

206

207

208 **Table 2. Weighted prevalence of diarrhea by livelihood zone, administrative zone, and**  
 209 **child sex across survey waves (% , [95% CI]).**

| Variable            | Wave 1            | Wave 2            | Wave 3            | Wave 4            | Wave 5            | Wave 6           | P-value <sup>a</sup> |
|---------------------|-------------------|-------------------|-------------------|-------------------|-------------------|------------------|----------------------|
| Overall             | 32.1 [28.3, 36.1] | 30.0 [26.0, 34.4] | 27.9 [24.1, 32.1] | 15.7 [12.5, 19.6] | 17.8 [14.2, 21.9] | 8.7 [6.3, 11.7]  | <0.001               |
| Livelihood zone     |                   |                   |                   |                   |                   |                  |                      |
| Pastoral            | 31.2 [26.4, 36.4] | 27.8 [22.5, 33.7] | 28.6 [24.0, 33.7] | 12.5 [8.8, 17.5]  | 16.9 [12.7, 22.2] | 7.0 [4.3, 11.3]  | < 0.001              |
| Non-pastoral        | 33.6 [27.8, 40.0] | 31.9 [26.1, 38.2] | 26.9 [20.9, 33.9] | 22.4 [17.3, 28.4] | 19.6 [13.9, 26.8] | 11.9 [8.5, 16.4] |                      |
| Administrative zone |                   |                   |                   |                   |                   |                  |                      |
| Central             | 25.8 [20.4, 32.1] | 32.8 [24.9, 41.7] | 26.8 [20.3, 34.5] | 18.4 [14.7, 22.9] | 22.3 [18.0, 27.2] | 9.4 [5.7, 14.9]  | 0.004                |
| North               | 41.6 [33.1, 50.6] | 22.5 [14.5, 33.2] | 14.8 [8.7, 24.1]  | 22.1 [14.9, 31.5] | 14.2 [7.6, 24.9]  | 14.1 [8.1, 23.5] | 0.868                |
| South               | 34.8 [27.5, 42.8] | 37.9 [30.8, 45.5] | 35.3 [28.6, 42.6] | 17.3 [11.6, 24.9] | 25.3 [18.2, 34.0] | 8.2 [5.6, 11.9]  | 0.335                |
| West                | 25.9 [20.4, 32.5] | 28.2 [21.4, 36.2] | 35.8 [30.6, 41.5] | 6.9 [3.9, 12.3]   | 11.9 [7.2, 18.9]  | 2.9 [1.4, 6.1]   | 0.035                |
| Child sex           |                   |                   |                   |                   |                   |                  |                      |
| Male                | 33.9 [28.4, 40.0] | 31.7 [26.1, 37.8] | 26.2 [21.0, 32.2] | 15.1 [11.1, 20.1] | 18.9 [14.3, 24.4] | 6.1 [4.0, 9.1]   | 0.294                |
| Female              | 29.7 [24.5, 35.7] | 28.2 [22.5, 34.7] | 29.8 [24.1, 36.3] | 16.5 [12.2, 21.9] | 16.6 [12.2, 22.0] | 11.5 [7.7, 16.9] |                      |

<sup>a</sup> Test for the trend in the prevalence of diarrhea across time

Note: The study data collection period; Wave 1 (May/June 2021), Wave 2 (November 2021), Wave 3 (May/June 2022), Wave 4 (October /November 2022, Wave 5 (March 2023) and Wave 6 (August/September 2023).

210

211 In bivariate analysis, the following factors were associated with diarrhea at  $p < 0.2$ : distal factors  
 212 (livelihood and administrative zones), intermediate factors (child age and sex, caregiver age,  
 213 caregiver number of living children, caregiver alcohol consumption, head of household age,  
 214 household shocks), proximal factors (household water insecurity, handwashing of caregiver  
 215 after visiting toilet, household open defecation) and childhood wasting (**S1 Table**). After  
 216 adjusting for potential confounders in multivariable models (**Table 3**), children with caregivers  
 217 who consumed alcohol were found to have higher odds of diarrhea (AOR = 1.30; 95% CI: 1.04  
 218 - 1.62) compared to those whose caregivers did not. In addition, children in households that  
 219 experienced three (AOR = 1.78; 95% CI: 1.29 - 2.45) or four (AOR = 2.58; 95% CI: 1.86 -  
 220 3.58) shocks had higher odds of diarrhea compared to those in households that experienced  
 221 fewer than two shocks. Relative to children living in households with no-to-marginal water

222 insecurity, those in households with moderate (AOR = 1.25; 95% CI: 1.04 - 1.50) or high-water  
 223 insecurity (AOR = 1.50; 95% CI: 1.22 - 1.85) had higher odds of diarrhea. The analysis  
 224 revealed that the households within the pastoral livelihood zone, children's age, number of  
 225 children living with the caregiver and handwashing practice by the caregiver were protective  
 226 factors against diarrhea.

227

228 **Table 3. Factors associated with diarrhea among children under five in Turkana County,**  
 229 **Kenya.**

| Variable                                                                       | AOR [95% CI]      | P-value |
|--------------------------------------------------------------------------------|-------------------|---------|
| Survey period (Ref: Wave 1)                                                    |                   |         |
| Wave 2                                                                         | 1.05 [0.81, 1.24] | 0.566   |
| Wave 3                                                                         | 0.91 [0.76, 1.08] | 0.272   |
| Wave 4                                                                         | 0.45 [0.37, 0.54] | <0.001  |
| Wave 5                                                                         | 0.52 [0.43, 0.63] | <0.001  |
| Wave 6                                                                         | 0.21 [0.17, 0.27] | <0.001  |
| <b>Distal factors</b>                                                          |                   |         |
| Livelihood zone (Ref. non-pastoral)                                            |                   |         |
| Pastoral                                                                       | 0.87 [0.77, 0.99] | 0.038   |
| Administrative zone (Ref: Central)                                             |                   |         |
| North                                                                          | 0.92 [0.73, 1.18] | 0.523   |
| South                                                                          | 1.18 [0.99, 1.42] | 0.064   |
| West                                                                           | 0.94 [0.78, 1.13] | 0.488   |
| <b>Intermediate factors (adjusted for distal factors)</b>                      |                   |         |
| Child age (months)                                                             | 0.97 [0.96, 0.98] | < 0.001 |
| Child sex (Ref: Male)                                                          |                   |         |
| Female                                                                         | 1.03 [0.90, 1.19] | 0.675   |
| Caregiver age (years)                                                          | 0.99 [0.98, 1.00] | 0.029   |
| Caregiver number of living children (Ref: < 3)                                 |                   |         |
| 3-5                                                                            | 0.79 [0.67, 0.93] | 0.006   |
| 6 or more                                                                      | 0.93 [0.74, 1.16] | 0.494   |
| Caregiver alcohol consumption (Ref: No)                                        |                   |         |
| Yes                                                                            | 1.30 [1.04, 1.62] | 0.020   |
| Shocks experienced in the last 4 months before the survey (Ref: less than two) |                   |         |
| Two                                                                            | 1.15 [0.83, 1.59] | 0.412   |
| Three                                                                          | 1.78 [1.29, 2.45] | <0.001  |
| Four                                                                           | 2.58 [1.86, 3.58] | <0.001  |

### Proximal factors (adjusted for distal and intermediate factors)

|                                                                                  |                   |        |
|----------------------------------------------------------------------------------|-------------------|--------|
| Household water insecurity (Ref: no-to-marginal)                                 |                   |        |
| Low                                                                              | 1.20 [0.98, 1.47] | 0.080  |
| Moderate                                                                         | 1.25 [1.04, 1.50] | 0.020  |
| High                                                                             | 1.50 [1.22, 1.85] | <0.001 |
| Caregiver wash hands after using the toilet (Ref: no)                            |                   |        |
| Yes                                                                              | 0.87 [0.74, 1.03] | 0.090  |
| Household practised open defecation (Ref: No)                                    |                   |        |
| Yes                                                                              | 1.04 [0.88, 1.22] | 0.650  |
| <b>Immediate factor (adjusted for distal, intermediate and proximal factors)</b> |                   |        |
| Wasted (WHZ < -2SD)                                                              | 1.22 [1.05, 1.41] | 0.010  |

*Note: The study data collection period: Wave 1 (May/June 2021), Wave 2 (November 2021), Wave 3 (May/June 2022), Wave 4 (October /November 2022), Wave 5 (March 2023) and Wave 6 (August/September 2023).*

230

## 231 Discussion

232 In this study, we found that caregiver alcohol consumption, household water insecurity,  
233 household shocks, and child wasting analysis were associated with higher odds of diarrhea in  
234 children. These findings align with prior studies and can help to inform policies and programs  
235 that aim to reduce the high burden of child diarrhea in Turkana County, Kenya.

236

237 Households in the drylands of sub-Saharan Africa suffer from frequent shocks, extended  
238 periods of poverty, and vulnerability, which hinder access to food, water and primary  
239 healthcare. Studies have shown that shocks often exacerbate existing vulnerabilities,  
240 particularly among marginalized communities that heavily depend on livestock [33,51].  
241 Further, research indicates that these vulnerabilities adversely affect child nutrition, a key risk  
242 factor for childhood morbidity and mortality, as families struggle to maintain adequate food  
243 intake and access to clean water during crises [52–54]. Our study provides further evidence on  
244 the effects of household experience of shocks on the risk of childhood diarrhea in an arid land  
245 in Kenya.

246

247 Pastoral livelihood in sub-Saharan Africa increases vulnerability to shocks due to recurrent  
248 droughts and famines rendering many destitute and chronically dependent on food aid. Some  
249 households adapt to this situation by diversifying into activities that generate cash income, such  
250 as petty trade, crafting, weaving, and basketry. Research has shown that when pastoral  
251 households experience loss of livestock, children are particularly vulnerable to illnesses such  
252 as diarrhea and respiratory infections, primarily due to poor nutrition and limited access to  
253 primary healthcare [55,56]. Further, a study conducted in three pastoralist communities in  
254 northern Kenya provides evidence for the importance of a contextualized approach detailing  
255 how social environments that include endemic conflict produce variations in health [57]. The  
256 present study has shown that pastoral livelihood is a protective factor for childhood diarrhea  
257 contrary to the previous findings, opening a research question for further investigations in the  
258 future.

259

260 Our study revealed that children of caregivers who reported alcohol consumption had  
261 significantly higher odds of experiencing diarrhea. While caregiver alcoholism has been  
262 associated with persistent malnutrition in children under five [58], there is limited research  
263 directly connecting it to diarrhea. Qualitative data from Wave 1 of this longitudinal study  
264 suggested that alcohol use compromised caregivers' abilities to provide adequate and hygienic  
265 care, likely contributing to the observed association [59].

266

267 Greater experiences of household water insecurity (which includes issues with water  
268 availability, accessibility, and sufficiency for diverse household uses) have been similarly  
269 positively associated with diarrhea risk among children under 5 in Cameroon [60], Ethiopia  
270 [61], and Nigeria [62]. Most studies, however, have only examined child diarrhea related to

271 directly observable, supply-side water indicators, such as water source and quality [63,64]. Our  
272 findings demonstrate that experiential measures of water insecurity provide complementary  
273 information to traditional water metrics and make clear that water insecurity is an important  
274 modifiable risk factor that should be targeted to improve child health and well-being.

275

276 Malnutrition, particularly wasting, was also significantly associated with the odds of child  
277 diarrhea. Malnutrition undermines child development by depleting nutritional reserves and  
278 compromising the immune system, thereby increasing susceptibility to diarrheal infections  
279 [65]. Diarrhea, in turn, can exacerbate malnutrition, leading to a bidirectional relationship  
280 between these two conditions that ultimately increases the risk of child mortality [66–68].  
281 Previous studies have associated childhood wasting with severe diarrhea episodes [69,70]; our  
282 findings further support wasting as a key risk factor for diarrheal infection.

283

284 Our study had several limitations. First, caregiver-reported child diarrhea is subject to recall  
285 bias. Further, we did not ask about the type of diarrhea observed (e.g., acute watery, acute  
286 bloody, or persistent), as each might have different health impacts. Systematic reviews have,  
287 however, noted a lack of evidence supporting the validity of instruments used in pediatric  
288 diarrheal disease trials [71]. Future research is needed to develop and validate better child  
289 diarrhea measures so that analyses can be disaggregated by diarrhea sub-type. Second, this  
290 longitudinal study was not originally designed to assess diarrhea as a primary outcome,  
291 although the large sample size reduces the risk of underpowered analyses.

292

## 293 **Conclusion**

294 In this study of diarrhea among children under five in the drylands of Northern Kenya, we  
295 found that the prevalence of diarrhea decreased as children got older. Baseline surveys were

296 conducted during the dry season, which may have also contributed to the prevalence of diarrhea  
297 observed at this time point. The findings on diarrhea prevalence disaggregated across survey  
298 waves can serve as useful referents for future targeted interventions in this region, particularly  
299 among non-pastoralists and households in the North zone, where the prevalence was highest.  
300 Key risk factors for diarrhea in Turkana County included caregiver alcohol use, household  
301 experience of shocks, household water insecurity, and child wasting.

302

303 A multisectoral approach is recommended to reduce the burden of diarrheal disease among  
304 children under five in this region. Such an approach should prioritize interventions that improve  
305 access to improved WASH services, address malnutrition prevention and management, and  
306 reduce the burden of household economic and climatic shocks. Lastly, there's a need for  
307 intervention to reduce alcohol consumption among women as this may contribute towards  
308 reducing the burden of diarrhea among children under five years.

309

## 310 **Funding information**

311 The Nawiri Longitudinal Study was made possible by the generous support of the American  
312 people through the United States Agency for International Development (USAID) (Award  
313 Number: 72DFFP19CA00003). The contents of this paper are the responsibility of the  
314 authors and do not necessarily reflect the views of USAID or the United States Government.

315

## 316 **Conflict of interest**

317 All authors declare that they do not have any competing interests to declare.

318

## 319 **Data sharing**



320 The data underlying this study will be made available to researchers through the APHRC's  
321 Microdata Portal (<https://aphrc.org/microdata-portal/>).

322

### 323 **Author contributions**

324 FT, DA, VLF, CKL, AW, and ES designed the study. CW, DA, BM, EA, HO, SE, and GC  
325 implemented fieldwork. CW, ES, FT, and EK-M provided study oversight. BM, JDM, and  
326 CW analyzed the data. BM prepared the first draft of the manuscript and incorporated  
327 comments from co-authors. All authors contributed to the revision of the manuscript and  
328 approved the final version.

## 329 References

- 330 1. World Health Organization (WHO). Diarrhoeal disease. Fact Sheets. Mar 2024.  
331 Available: <https://www.who.int/news-room/fact-sheets/detail/diarrhoeal-disease>
- 332 2. Troeger C, Blacker BF, Khalil IA, Rao PC, Cao S, Zimsen SRM, et al. Estimates of  
333 the global, regional, and national morbidity, mortality, and aetiologies of diarrhoea in  
334 195 countries: a systematic analysis for the Global Burden of Disease Study 2016.  
335 *Lancet Infect Dis.* 2018;18: 1211–1228.
- 336 3. Young H. Nutrition in Africa’s drylands: a conceptual framework for addressing acute  
337 malnutrition. Feinstein International Center, Tufts University. 2020.
- 338 4. Council AW. Vulnerability of arid and semi-arid regions to climate change—Impacts  
339 and adaptive strategies. Perspective Document for the 5th World Water Forum, World  
340 Water Council, Marseille, Co-Operative Programme on Water and Climate (CPWC).  
341 The Hague, IUCN, Gland and International Water Association (IWA) The Hague ...;  
342 2009.
- 343 5. Bulled N, Singer M, Dillingham R. The syndemics of childhood diarrhoea: a biosocial  
344 perspective on efforts to combat global inequities in diarrhoea-related morbidity and  
345 mortality. *Glob Public Health.* 2014;9: 841–853.
- 346 6. Guerrant RL, Oriá RB, Moore SR, Oriá MOB, Lima AAM. Malnutrition as an enteric  
347 infectious disease with long-term effects on child development. *Nutr Rev.* 2008;66:  
348 487–505.
- 349 7. Moore SR, Lima AAM, Conaway MR, Schorling JB, Soares AM, Guerrant RL. Early  
350 childhood diarrhoea and helminthiases associate with long-term linear growth  
351 faltering. *Int J Epidemiol.* 2001;30: 1457–1464.
- 352 8. Colombara D V, Hernández B, McNellan CR, Desai SS, Gagnier MC, Haakenstad A,  
353 et al. Diarrhea prevalence, care, and risk factors among poor children under 5 years of  
354 age in Mesoamerica. *Am J Trop Med Hyg.* 2016;94: 544.
- 355 9. Pokharel M, Sherchand JB, Upreti HC, Katuwal A, Gauchan P. A perspective study on  
356 the etiology of diarrhea in children less than 12 years of age attending Kanti Children’s  
357 Hospital. *Journal of Nepal Paediatric Society.* 2009;29: 10–16.
- 358 10. Atnafu A, Sisay MM, Demissie GD, Tessema ZT. Geographical disparities and  
359 determinants of childhood diarrheal illness in Ethiopia: further analysis of 2016  
360 Ethiopian Demographic and Health Survey. *Trop Med Health.* 2020;48: 1–12.
- 361 11. Buchwald AG, Verani JR, Keita AM, Jahangir Hossain M, Roose A, Sow SO, et al.  
362 Etiology, presentation, and risk factors for diarrheal syndromes in 3 sub-Saharan  
363 African countries after the introduction of rotavirus vaccines from the Vaccine Impact  
364 on Diarrhea in Africa (VIDA) study. *Clinical Infectious Diseases.* 2023;76: S12–S22.
- 365 12. Demissie GD, Yeshaw Y, Alemine W, Akalu Y. Diarrhea and associated factors  
366 among under five children in sub-Saharan Africa: evidence from demographic and  
367 health surveys of 34 sub-Saharan countries. *PLoS One.* 2021;16: e0257522.

- 368 13. Hajara A, Faisal M. Rabi'U. Risk factors associated with prevalence of diarrhea  
369 among under 5 years children in low socioeconomic area of urban Bangladesh. *Int Res*  
370 *J Nat Appl Sci.* 2017;4: 12.
- 371 14. Habtu M, Nsabimana J, Mureithi C. Factors contributing to diarrheal diseases among  
372 children less than five years in Nyarugenge District, Rwanda. *J Trop Dis.* 2017;5: 238.
- 373 15. He Z, Ghose B, Cheng Z. Diarrhea as a Disease of Poverty Among Under-Five  
374 Children in Sub-Saharan Africa: A Cross-Sectional Study. *INQUIRY: The Journal of*  
375 *Health Care Organization, Provision, and Financing.* 2023;60: 00469580231202988.
- 376 16. Agegnehu MD, Bewket Zeleke L, Goshu YA, Ortibo YL, Mehretie Adinew Y.  
377 Diarrhea Prevention Practice and Associated Factors among Caregivers of Under-Five  
378 Children in Enemay District, Northwest Ethiopia. *J Environ Public Health.* 2019;2019:  
379 5490716.
- 380 17. Dagne AB, Tewabe T, Miskir Y, Eshetu T, Kefelegn W, Zerihun K, et al. Prevalence  
381 of diarrhea and associated factors among under-five children in Bahir Dar city,  
382 Northwest Ethiopia, 2016: a cross-sectional study. *BMC Infect Dis.* 2019;19: 1–7.
- 383 18. Solomon ET, Gari SR, Kloos H, Alemu BM. Handwashing effect on diarrheal  
384 incidence in children under 5 years old in rural eastern Ethiopia: a cluster randomized  
385 controlled trial. *Trop Med Health.* 2021;49: 1–11.
- 386 19. Ayalew AM, Mekonnen WT, Abaya SW, Mekonnen ZA. Assessment of Diarrhea and  
387 Its Associated Factors in Under-Five Children among Open Defecation and Open  
388 Defecation-Free Rural Settings of Dangla District, Northwest Ethiopia. *J Environ*  
389 *Public Health.* 2018;2018: 4271915.
- 390 20. Islam M, Rahman M, Unicomb L, Kafi MAH, Rahman M, Alam M, et al. Child  
391 defecation and feces management practices in rural Bangladesh: Associations with  
392 fecal contamination, observed hand cleanliness and child diarrhea. *PLoS One.*  
393 2020;15: e0236163.
- 394 21. Hailu B, Ji-Guo W, Hailu T. Water, Sanitation, and Hygiene Risk Factors on the  
395 Prevalence of Diarrhea among Under-Five Children in the Rural Community of  
396 Dangila District, Northwest Ethiopia. *J Trop Med.* 2021;2021: 2688500.
- 397 22. Mengistie B, Berhane Y, Worku A. Prevalence of diarrhea and associated risk factors  
398 among children under-five years of age in Eastern Ethiopia: A cross-sectional study.  
399 *Open J Prev Med.* 2013;3: 446.
- 400 23. Dessalegn M, Kumie A, Tefera W. Predictors of under-five childhood diarrhea: Mecha  
401 District, west Gojam, Ethiopia. *Ethiopian journal of health development.* 2011;25:  
402 192–200.
- 403 24. Berde A, YALÇIN S, Ozcebe L, Üner S, Karadag-Caman Ö. Determinants of  
404 childhood diarrhea among under-five year old children in Nigeria: A population-based  
405 study using the 2013 demographic and health survey data. *Turkish Journal of*  
406 *Pediatrics.* 2018;60.

- 407 25. Teshale AB, Liyew AM, Tesema GA. Factors associated with zinc utilization for the  
408 management of diarrhea in under-five children in Ethiopia. *BMC Public Health*.  
409 2020;20: 1–7.
- 410 26. Pienaah CKA, Yoshida Y, Saaka SA, Ategeeng FN, Luginaah I. Determinants of  
411 diarrhea prevalence among children under 5 years in semi-arid Ghana. *Journal of*  
412 *Water, Sanitation and Hygiene for Development*. 2024;14: 583–594.
- 413 27. Dimitrova A, Gershunov A, Levy MC, Benmarhnia T. Uncovering social and  
414 environmental factors that increase the burden of climate-sensitive diarrheal infections  
415 on children. *Proceedings of the National Academy of Sciences*. 2023;120:  
416 e2119409120.
- 417 28. Genser B, Strina A, Teles CA, Prado MS, Barreto ML. Risk factors for childhood  
418 diarrhea incidence: dynamic analysis of a longitudinal study. *Epidemiology*. 2006;17:  
419 658–667.
- 420 29. Kurui JE, Ogendi MG, Moturi NW, Nyawanga OD. Household water handling  
421 practices in the arid and semi-arid lands in Kenya. *The Relevance of Hygiene to*  
422 *Health in Developing Countries*. IntechOpen; 2019. pp. 79–89.
- 423 30. Maldonado MEM. Evaluating Drivers and Sources of Pathogens to Surface Waters in  
424 Primarily Arid and Semi-Arid Tribal Lands of the United States. Arizona State  
425 University; 2023.
- 426 31. Zelaya S. Climate change in the African drylands: options and opportunities for  
427 adaptation and mitigation. 2009.
- 428 32. Ketiém P, Diarra A, Soura A, Konou R. Strategies for adapting to water stress in the  
429 arid and semi-arid regions of Africa. Synthesis brief. 2015.
- 430 33. Lind J, Sabates-Wheeler R, Kohnstamm S. Changes in the drylands of Eastern Africa:  
431 A review of evidence and data and their implications for efforts to strengthening  
432 resilience. Institute of Development Studies Available at: [https://opendocs.ids.ac](https://opendocs.ids.ac.uk/opendocs/handle/20500.2016;12413:12082)  
433 [uk/opendocs/handle/20500.2016;12413:12082](https://opendocs.ids.ac.uk/opendocs/handle/20500.2016;12413:12082).
- 434 34. Hobbs N, Hug J, de Pee S. High Non-affordability of Diets and Malnutrition in  
435 Africa’s Drylands: Systems Analysis to Guide Action. *Food Nutr Bull*. 2023;44: S45–  
436 S57.
- 437 35. Johnson N, Wambile A. The impacts of the Arid Lands Resource Management Project  
438 (ALRMPII) on livelihoods and vulnerability in the arid and semi-arid lands of Kenya.  
439 ILRI (aka ILCA and ILRAD); 2011.
- 440 36. Mokomane M, Kasvosve I, Melo E de, Pernica JM, Goldfarb DM. The global problem  
441 of childhood diarrhoeal diseases: emerging strategies in prevention and management.  
442 *Ther Adv Infect Dis*. 2018;5: 29–43.
- 443 37. Amwata DA, Nyariki DM. Climate variability, land-use, pastoral and agropastoral  
444 livelihoods in arid and semi-arid areas of Kenya. 2021.

- 445 38. Ngugi RK, Nyariki DM. Rural livelihoods in the arid and semi-arid environments of  
446 Kenya: Sustainable alternatives and challenges. *Agric Human Values*. 2005;22: 65–71.
- 447 39. Moreira RP, Costa AC, Gomes TF, de Oliveira Ferreira G. Climate and climate-  
448 sensitive diseases in semi-arid regions: a systematic review. *Int J Public Health*.  
449 2020;65: 1749–1761.
- 450 40. Atake E-H. Health shocks in Sub-Saharan Africa: are the poor and uninsured  
451 households more vulnerable? *Health Econ Rev*. 2018;8: 1–13.
- 452 41. Dinku Y, Fielding D, Genç M. Health shocks and child time allocation decisions by  
453 households: evidence from Ethiopia. *IZA J Labor Econ*. 2018;7: 1–23.
- 454 42. USAID Nawiri fact sheet 2023.
- 455 43. Kihu SM, Gachohi JM, Ndungu EK, Gitao GC, Bebora LC, John NM, et al. Sero-  
456 epidemiology of Peste des petits ruminants virus infection in Turkana County, Kenya.  
457 *BMC Vet Res*. 2015;11: 1–13.
- 458 44. Akall G. Effects of development interventions on pastoral livelihoods in Turkana  
459 County, Kenya. *Pastoralism*. 2021;11: 23.
- 460 45. Wilunda C, Sidze E, Thuita F, Amugsi D, Abajobir A, Mutua M, et al. Examining the  
461 complex dynamics influencing acute malnutrition in Turkana and Samburu counties:  
462 study protocol. *Matern Child Nutr*. 2024; e13744.
- 463 46. Young SL, Boateng GO, Jamaluddine Z, Miller JD, Frongillo EA, Neilands TB, et al.  
464 The Household Water InSecurity Experiences (HWISE) Scale: development and  
465 validation of a household water insecurity measure for low-income and middle-income  
466 countries. *BMJ Glob Health*. 2019;4: e001750.
- 467 47. Organization WH. World Health Organization releases new child growth standards.  
468 World Health Organization releases new child growth standards. 2006. p. 2.
- 469 48. Victora CG, Huttly SR, Fuchs SC, Olinto MT. The role of conceptual frameworks in  
470 epidemiological analysis: a hierarchical approach. *Int J Epidemiol*. 1997;26: 224–227.
- 471 49. Liang K-Y, Zeger SL. Longitudinal data analysis using generalized linear models.  
472 *Biometrika*. 1986;73: 13–22.
- 473 50. Zeger SL, Liang K-Y, Albert PS. Models for longitudinal data: a generalized  
474 estimating equation approach. *Biometrics*. 1988; 1049–1060.
- 475 51. Agulonye UVP. Fragilities and shocks effects on households and communities in West  
476 Africa. 2023.
- 477 52. Pérez-Mesa D, Marrero GA, Darias-Curvo S. Child health inequality in Sub-Saharan  
478 Africa. *Econ Hum Biol*. 2022;47: 101176.
- 479 53. Bonjean CA, Brunelin S, Simonet C. Impact of climate related shocks on child’s health  
480 in Burkina Faso. 2012.
- 481 54. Cornia GA, Rosignoli S, Tiberti L. The impact of the food and Financial Crises on  
482 child mortality: The case of sub-Saharan Africa. UN; 2011.

- 483 55. Fratkin E, Roth EA, Nathan MA. Pastoral sedentarization and its effects on children's  
484 diet, health, and growth among Rendille of Northern Kenya. *Hum Ecol.* 2004;32: 531–  
485 559.
- 486 56. Catley A, Admassu B, Bekele G, Abebe D. Livestock mortality in pastoralist herds in  
487 Ethiopia and implications for drought response. *Disasters.* 2014;38: 500–516.
- 488 57. Pike IL, Straight B, Oesterle M, Hilton C, Lanyasunya A. Documenting the health  
489 consequences of endemic warfare in three pastoralist communities of northern Kenya:  
490 a conceptual framework. *Soc Sci Med.* 2010;70: 45–52.
- 491 58. Abaasa CN, Rukundo GZ, Ayesiga S, Atukunda SP, Campisi S, O'Hearn S, et al.  
492 Healthcare providers and caregivers' perspectives on factors responsible for persistent  
493 malnutrition of under 5 children in Buhweju district, South Western Uganda; a  
494 phenomenological qualitative study. *BMC Public Health.* 2021;21: 1495.
- 495 59. USAID. Examining the complex dynamics influencing acute malnutrition in Turkana  
496 county: a longitudinal mixed-methods study to support community-driven activity  
497 design. Kenya; 2021. Available:  
498 [https://www.advancingnutrition.org/sites/default/files/2023-04/Mercy Corps\\_USAID](https://www.advancingnutrition.org/sites/default/files/2023-04/Mercy Corps_USAID_Nawiri_Turkana_LS_Qualitative_Report.pdf)  
499 [Nawiri\\_Turkana LS Qualitative Report.pdf](https://www.advancingnutrition.org/sites/default/files/2023-04/Mercy Corps_USAID_Nawiri_Turkana_LS_Qualitative_Report.pdf)
- 500 60. Nounkeu C, Kamgno J, Dharod J. Assessment of the relationship between water  
501 insecurity, hygiene practices, and incidence of diarrhea among children from rural  
502 households of the Menoua Division, West Cameroon. *J Public Health Afr.* 2019;10.
- 503 61. Aydamo AA, Gari SR, Mereta ST. The nexus between household water insecurity,  
504 mother's handwashing practices, and diarrheal diseases among under-five children. *J*  
505 *Water Health.* 2024; jwh2024026.
- 506 62. Akinyemi PA, Afolabi OT, Aluko OO. The effects of seasonal variations on household  
507 water security and burden of diarrheal diseases among under 5 children in an urban  
508 community, Southwest Nigeria. *BMC Public Health.* 2022;22: 1354.
- 509 63. Wolf J, Hubbard S, Brauer M, Ambelu A, Arnold BF, Bain R, et al. Effectiveness of  
510 interventions to improve drinking water, sanitation, and handwashing with soap on risk  
511 of diarrhoeal disease in children in low-income and middle-income settings: a  
512 systematic review and meta-analysis. *The Lancet.* 2022;400: 48–59.
- 513 64. Liu Q, Liu M, Liu J. Association of drinking water services with the disease burden of  
514 diarrhea in children under five in 200 countries from 2000 to 2021. *Cell Reports*  
515 *Sustainability.* 2024.
- 516 65. Schaible UE, Kaufmann SHE. Malnutrition and infection: complex mechanisms and  
517 global impacts. *PLoS Med.* 2007;4: e115.
- 518 66. Poda GG, Hsu C-Y, Chao JC-J. Factors associated with malnutrition among children <  
519 5 years old in Burkina Faso: evidence from the Demographic and Health Surveys IV  
520 2010. *International Journal for Quality in Health Care.* 2017;29: 901–908.

- 521 67. Ogayo M, Damaris O, Sadia M, Odipo JO, Ayodo G. Risk of Bidirectional Diarrhea-  
522 Malnutrition among Under-Five-Year-Old Children Admitted in Referral Hospitals in  
523 Western Kenya. *Afr J Health Sci.* 2024;36: 578–587.
- 524 68. Roy SK, Buis M, Weersma R, Khatun W, Chowdhury S, Begum A, et al. Risk factors  
525 of mortality in severely-malnourished children hospitalized with diarrhoea. *J Health  
526 Popul Nutr.* 2011;29: 229.
- 527 69. Shah SM, Yousafzai M, Lakhani NB, Chotani RA, Nowshad G. Prevalence and  
528 correlates of diarrhea. *The Indian Journal of Pediatrics.* 2003;70: 207–211.
- 529 70. Tickell KD, Pavlinac PB, John-Stewart GC, Denno DM, Richardson BA, Naulikha  
530 JM, et al. Impact of childhood nutritional status on pathogen prevalence and severity  
531 of acute diarrhea. *Am J Trop Med Hyg.* 2017;97: 1337.
- 532 71. Johnston BC, Shamseer L, da Costa BR, Tsuyuki RT, Vohra S. Measurement issues in  
533 trials of pediatric acute diarrheal diseases: a systematic review. *Pediatrics.* 2010;126:  
534 e222–e231.

535

536

## 537 **Supplementary Tables**

538 **S1 Table.** Bivariate logistic regression analysis of factors associated with diarrhea among  
539 children under five years of age



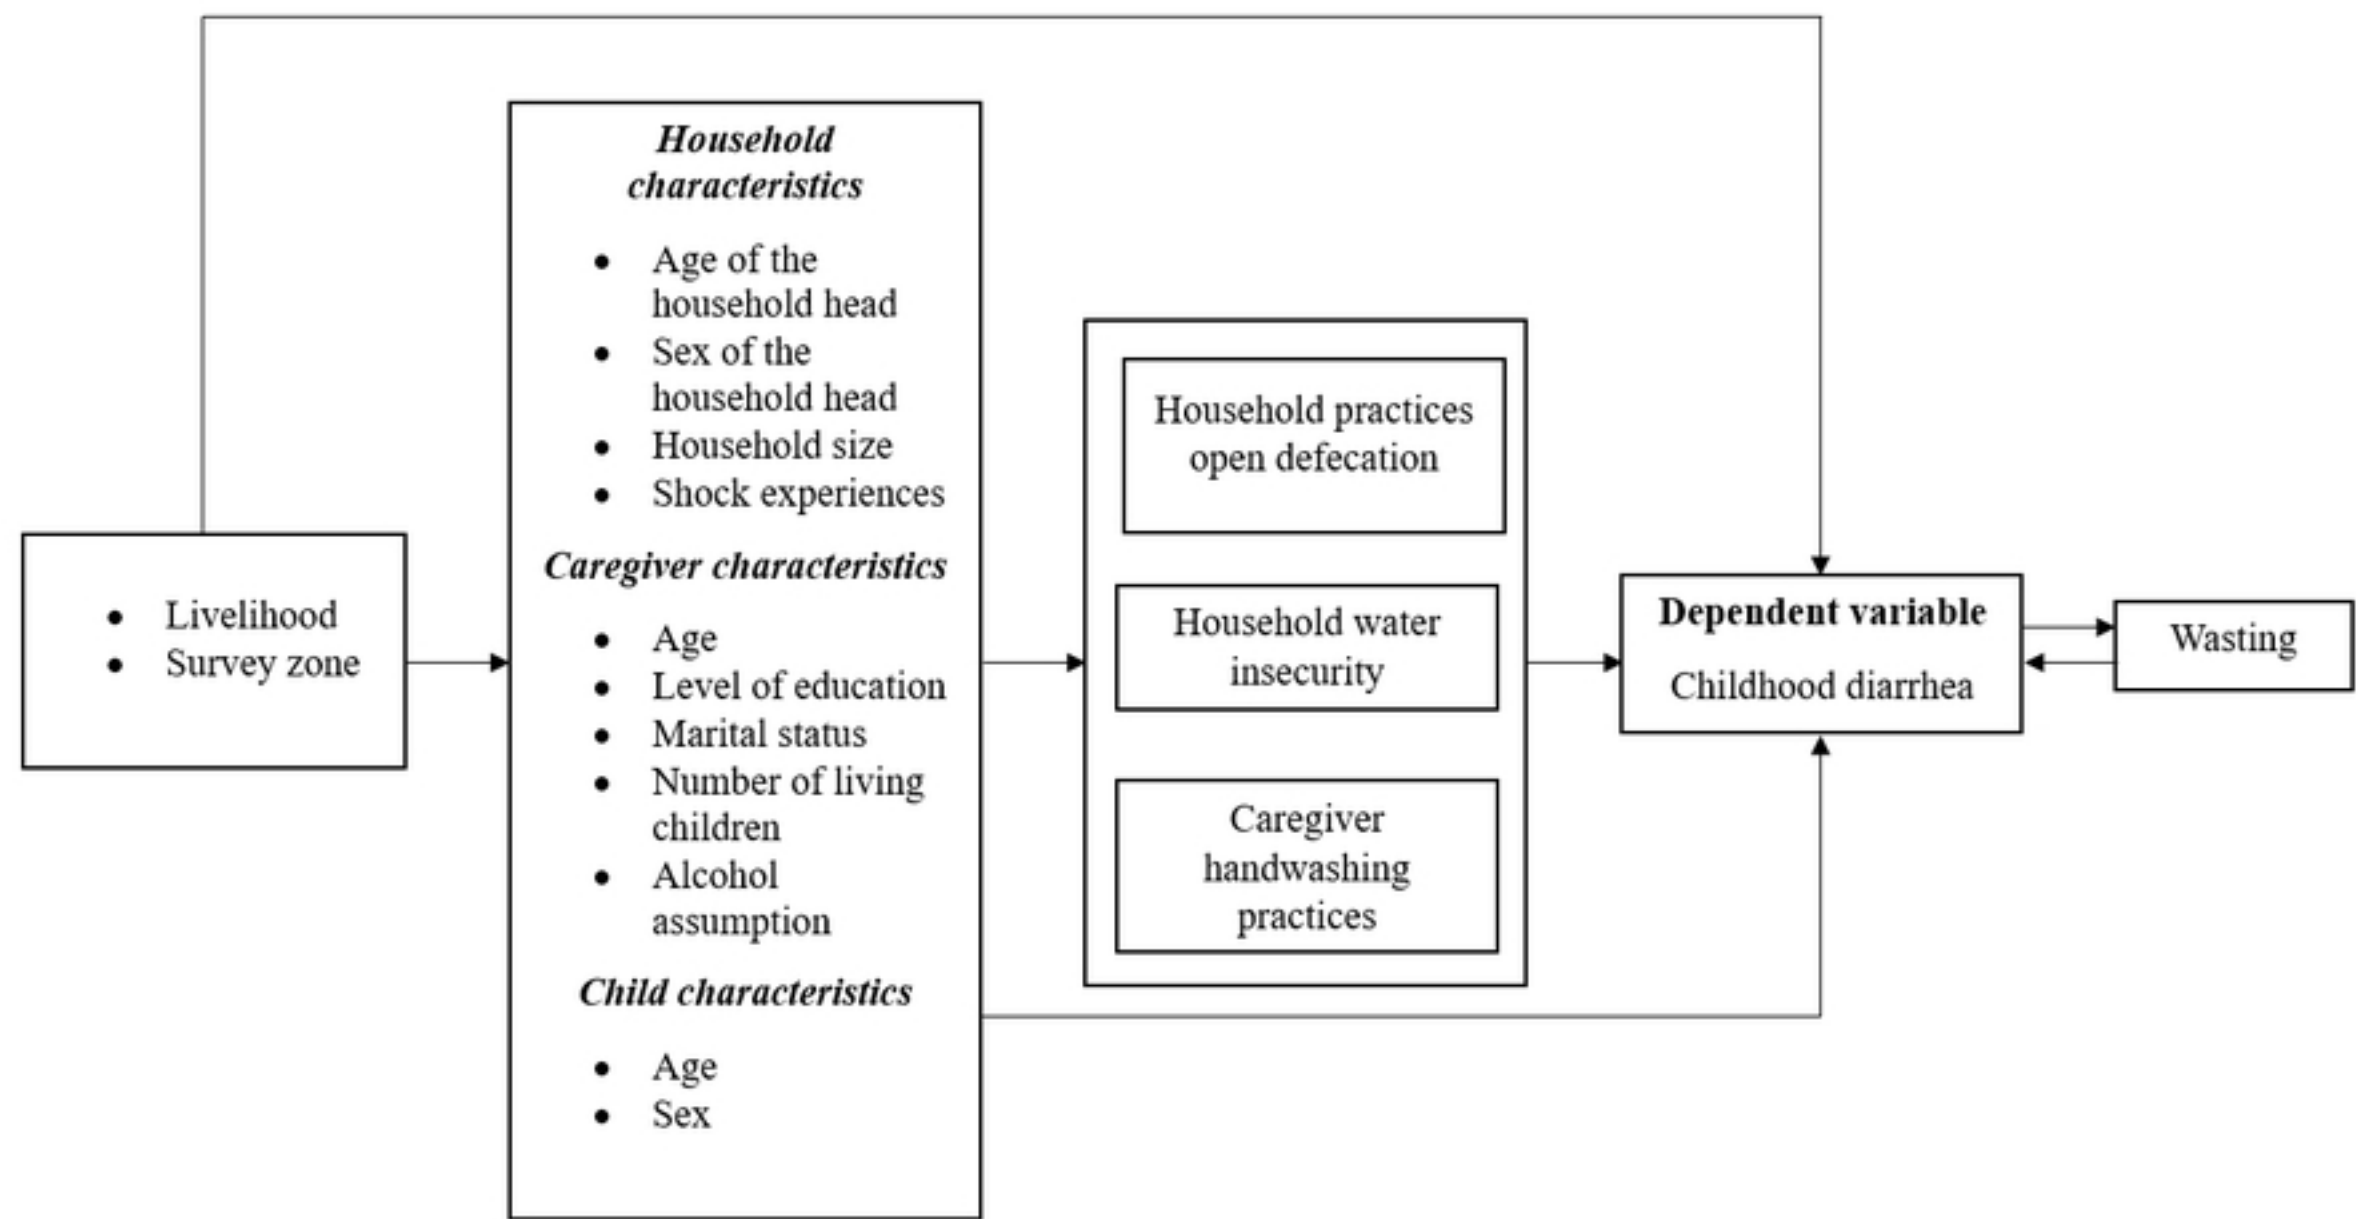

Figure
